# Supplementary material for: Socioeconomic Status and Reduced Kidney Function in the Whitehall II Study: Role of Obesity and Metabolic Syndrome
Source: PubMed Central journal article supplement (PMC3192873; doi:10.1053/j.ajkd.2011.04.017), 2011-09
Supplement: mmc1.pdf [file mmc1.pdf]

**Table S1. Age adjusted association of BMI and components of MS with eGFR as a continuous measure (derived from IDMS calibrated CKD-EPI formula, in ml/min/1.73m<sup>2</sup>) stratified by sex (each row refers to a separate model on the same set of participants)**

| Factor                                    | Men (N=4066)            |         | Women (N=1467)          |         |
|-------------------------------------------|-------------------------|---------|-------------------------|---------|
|                                           | Beta-coefficient(95%CI) | p-value | Beta-coefficient(95%CI) | p-value |
| Age* (years)                              | -5.38(-5.75 to -4.99)   | <0.001  | -6.12(-6.78 to -5.45)   | <0.001  |
| Occupational grade (per grade increase)   | -0.42(-1.09 to 0.25)    | 0.2     | -0.99(-1.99 to 0.003)   | 0.05    |
| BMI* (weight(kg)/height(m <sup>2</sup> )) | -1.48(-1.91 to -1.06)   | <0.001  | -1.22(-1.77 to -0.66)   | <0.001  |
| Waist circumference* (cm)                 | -1.42(-1.84 to -0.99)   | <0.001  | -1.15(-1.79 to -0.49)   | <0.001  |
| Systolic BP* (mmHg)                       | -0.41(-0.80 to -0.01)   | 0.04    | -0.41(-1.07 to 0.23)    | 0.2     |
| Diastolic BP* (mmHg)                      | -0.73(-1.11 to -0.35)   | <0.001  | -0.72(-1.40 to -0.04)   | 0.04    |
| HDL cholesterol* (mg/dL)                  | 1.70(1.28 to 2.12)      | <0.001  | 0.71(0.07 to 1.35)      | 0.03    |
| Triglycerides* (mg/dL)                    | -1.08(-1.44 to -0.73)   | <0.001  | -2.26(-3.09 to -1.43)   | <0.001  |
| Fasting glucose* (mg/dL)                  | -0.25(-0.65 to 0.15)    | 0.2     | -0.60(-1.31 to 0.10)    | 0.09    |
| Diabetes prevalence (yes vs. no)          | -0.42(-1.67 to 0.81)    | 0.5     | 1.16(-1.02 to -3.35)    | 0.3     |

\* Beta- coefficient represents change in eGFR in mL/min/1.73m<sup>2</sup> per one standard deviation increase in the factor  
-Abbreviations: BMI: body mass index, BP: blood pressure, eGFR: estimated glomerular filtration rate, HDL: high density lipoprotein cholesterol. . -Conversion factors: HDL cholesterol mg/dL to mmol/L, x 0.02586; Triglycerides mg/dL to mmol/L, x 0.01129; Fasting glucose mg/dL to mmol/L, x 0.05551. -LRT test for inclusion of quadratic term was significant in men and women (p=0.01, p=0.04)
