# Supplementary material for: Socioeconomic Status and Reduced Kidney Function in the Whitehall II Study: Role of Obesity and Metabolic Syndrome
Source: PubMed Central journal article supplement (PMC3192873; doi:10.1053/j.ajkd.2011.04.017), 2011-09
Supplement: mmc2.pdf [file mmc2.pdf]

**Table S2. Age adjusted odds ratios (with their 95% confidence intervals (CI)) by sex for the associations between CKD stages 3-5 (eGFR <60 ml/min/1.73m<sup>2</sup> derived from IDMS calibrated CKD-EPI formula) and body-mass index (BMI), and components of the metabolic syndrome amongst sample with impedance measurements (each row refers to a separate model on the same set of participants)**

| Factor                                     | Men (N=3627)       |         | Women (N=1211)     |         |
|--------------------------------------------|--------------------|---------|--------------------|---------|
|                                            | Odds ratio(95%CI)  | p-value | Odds ratio(95%CI)  | p-value |
| Age (per 1 year increase)                  | 1.17(1.14 to 1.20) | <0.001  | 1.12(1.07 to 1.18) | <0.001  |
| Occupational grade (per grade increase)    | 1.00(0.78 to 1.29) | 0.9     | 1.55(1.06 to 2.28) | 0.02    |
| BMI** (weight(kg)/height(m <sup>2</sup> )) |                    |         |                    |         |
| Overweight                                 | 1.76(1.27 to 2.44) | 0.001   | 2.11(1.08 to 4.11) | 0,02    |
| Obese                                      | 1.77(1.13 to 2.76) | 0.01    | 2.57(1.29 to 5.13) | 0,007   |
| Waist circumference* (cm)                  |                    |         |                    |         |
| Q2                                         | 1.68(1.08 to 2.61) | 0.02    | 1.24(0.57 to 2.67) | 0.6     |
| Q3                                         | 1.92(1.24 to 2.95) | 0.003   | 1.01(0.44 to 2.27) | 0.9     |
| Q4                                         | 1.87(1.19 to 2.91) | 0.006   | 1.55(0.72 to 3.32) | 0.3     |
| Systolic BP* (mmHg)                        |                    |         |                    |         |
| Q2                                         | 0.62(0.41 to 0.93) | 0.03    | 0.55(0.26 to 1.17) | 0.1     |
| Q3                                         | 0.63(0.42 to 0.94) | 0.02    | 0.71(0.36 to 1.41) | 0.3     |
| Q4                                         | 1.01(0.70 to 1.46) | 0.9     | 0.38(0.16 to 0.89) | 0.03    |
| Diastolic BP* (mmHg)                       |                    |         |                    |         |
| Q2                                         | 0.74(0.49 to 1.10) | 0.2     | 0.52(0.26 to 1.03) | 0.06    |
| Q3                                         | 0.88(0.60 to 1.30) | 0.5     | 0.33(0.14 to 0.78) | 0.01    |
| Q4                                         | 1.23(0.83 to 1.80) | 0.3     | 0.74(0.38 to 1.45) | 0.4     |
| HDL cholesterol* (mg/dL)                   |                    |         |                    |         |
| Q2                                         | 0.59(0.41 to 0.84) | 0.004   | 0.65(0.32 to 1.29) | 0.2     |
| Q3                                         | 0.52(0.33 to 0.81) | 0.004   | 0.57(0.28 to 1.16) | 0.1     |
| Q4                                         | 0.42(0.28 to 0.63) | <0.001  | 0.49(0.22 to 1.11) | 0.09    |
| Triglycerides* (mg/dL)                     |                    |         |                    |         |
| Q2                                         | 1.58(1.04 to 2.40) | 0.03    | 0.85(0.34 to 2.14) | 0.7     |
| Q3                                         | 2.09(1.40 to 3.10) | <0.001  | 2.16(1.07 to 4.35) | 0.03    |
| Q4                                         | 2.67(1.73 to 4.11) | <0.001  | 1.97(0.96 to 4.03) | 0.06    |
| Fasting glucose* (mg/dL)                   |                    |         |                    |         |
| Q2                                         | 1.08(0.72 to 1.62) | 0.7     | 0.75(0.37 to 1.48) | 0.4     |
| Q3                                         | 0.99(0.66 to 1.50) | 0.9     | 0.68(0.32 to 1.44) | 0.3     |
| Q4                                         | 1.19(0.81 to 1.77) | 0.4     | 0.77(0.37 to 1.61) | 0.5     |
| Diabetes prevalence (yes vs. no)           | 1.84(1.27 to 2.60) | 0.001   | 0.81(0.35 to 1.85) | 0.6     |

\*Sex specific quartiles of factors, OR demonstrates comparison to lowest quartile (Q1), \*\*BMI OR demonstrates comparison to participants in underweight/normal category -Abbreviations: BMI: body mass index, BP: blood pressure, HDL: high density lipoprotein cholesterol. -Conversion factors: HDL cholesterol mg/dL to mmol/L, x 0.02586; Triglycerides mg/dL to mmol/L, x 0.01129; Fasting glucose mg/dL to mmol/L, x 0.05551
